# Supplementary material for: Economic Evaluation of Interventions for Prevention of Hospital Acquired Infections: A Systematic Review
Source: PLOS journal article supplement (doi:10.1371/journal.pone.0146381), 2016-01-05
Supplement: S2 (10.1371/journal.pone.0146381.s002) [file journal.pone.0146381.s002]

**S2 Table. PubMed Search Strategy**

(prevention) OR (health promotion) OR ("primary prevention"[Mesh]) OR (lifestyle) OR (intervention) OR (counseling) OR (multimodal) OR (multi-factor\*) OR (multifactor\*) OR (multi-component) OR (risk assessment) OR (risk factor\*) OR (health education) OR ("health behavior"[Mesh]) OR ("risk reduction behavior"[Mesh]) OR ("risk factors"[Mesh]) AND ("Economics"[Mesh]) OR (Economics) OR (economic\*) OR ("Costs and Cost Analysis"[Mesh]) OR (cost) OR (efficiency) OR (return on investment) OR (direct cost\*) OR (indirect cost\*) OR (economic evaluation\*[ti]) OR (economic analy\*[ti]) OR (cost analy\*[ti]) OR (cost effectiveness[ti]) OR (cost benefit\*[ti]) OR (cost utilit\*[ti])) AND (nosocomial infection) OR (nosocomial) OR (hospital-acquired) OR (healthcare-associated) OR (hospital infection) OR ("Cross Infection"[Mesh])Filters: Publication date from 2009/01/01 to 2014/01/01; Humans; English; German
